# Supplementary material
Source: publisher site journal article supplement (https://www.dovepress.com/article/439589)
Supplement: Supplementary file 1 [file get_supplementary_file.php]

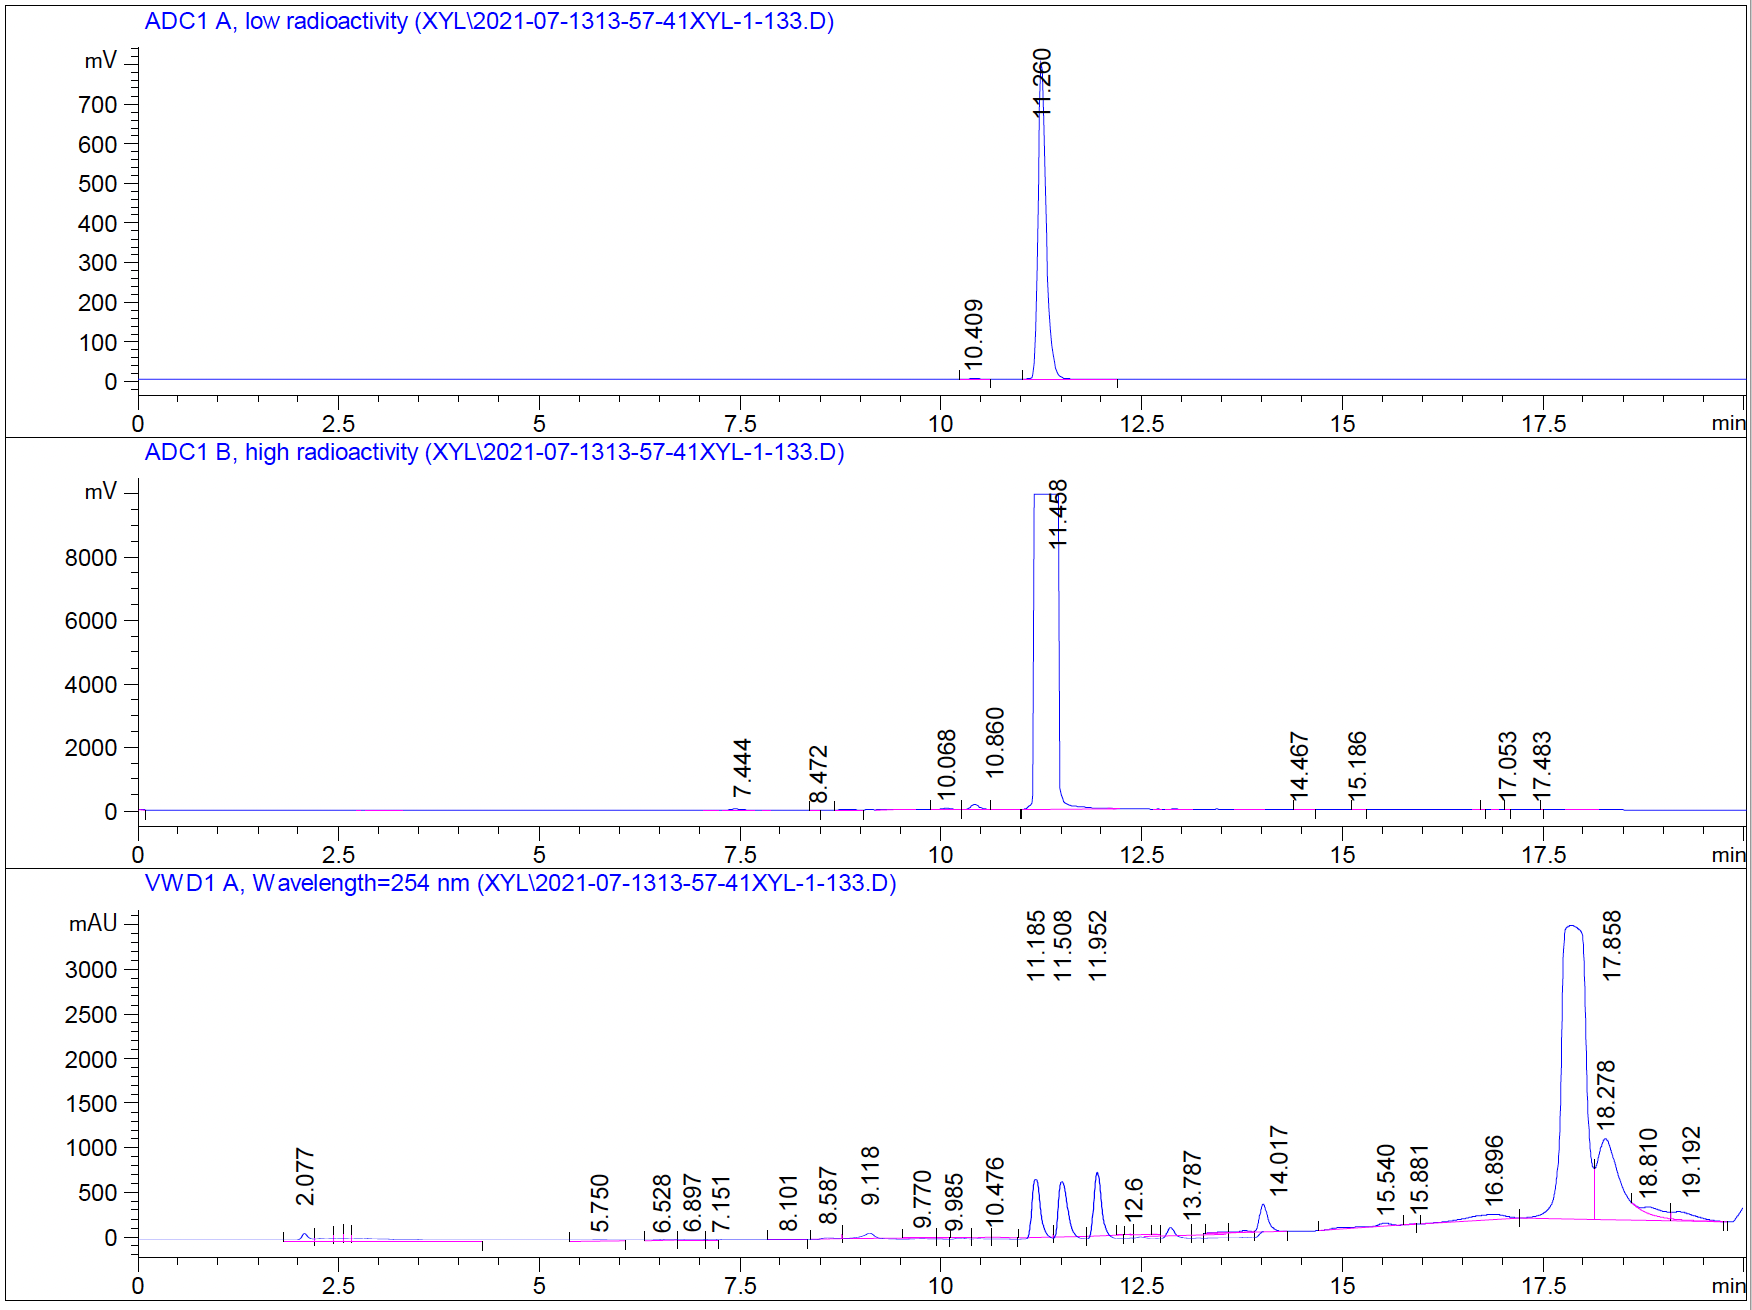


**Fig. S1.** Semipreparative purification HPLC chromatogram of [11C]**1**.


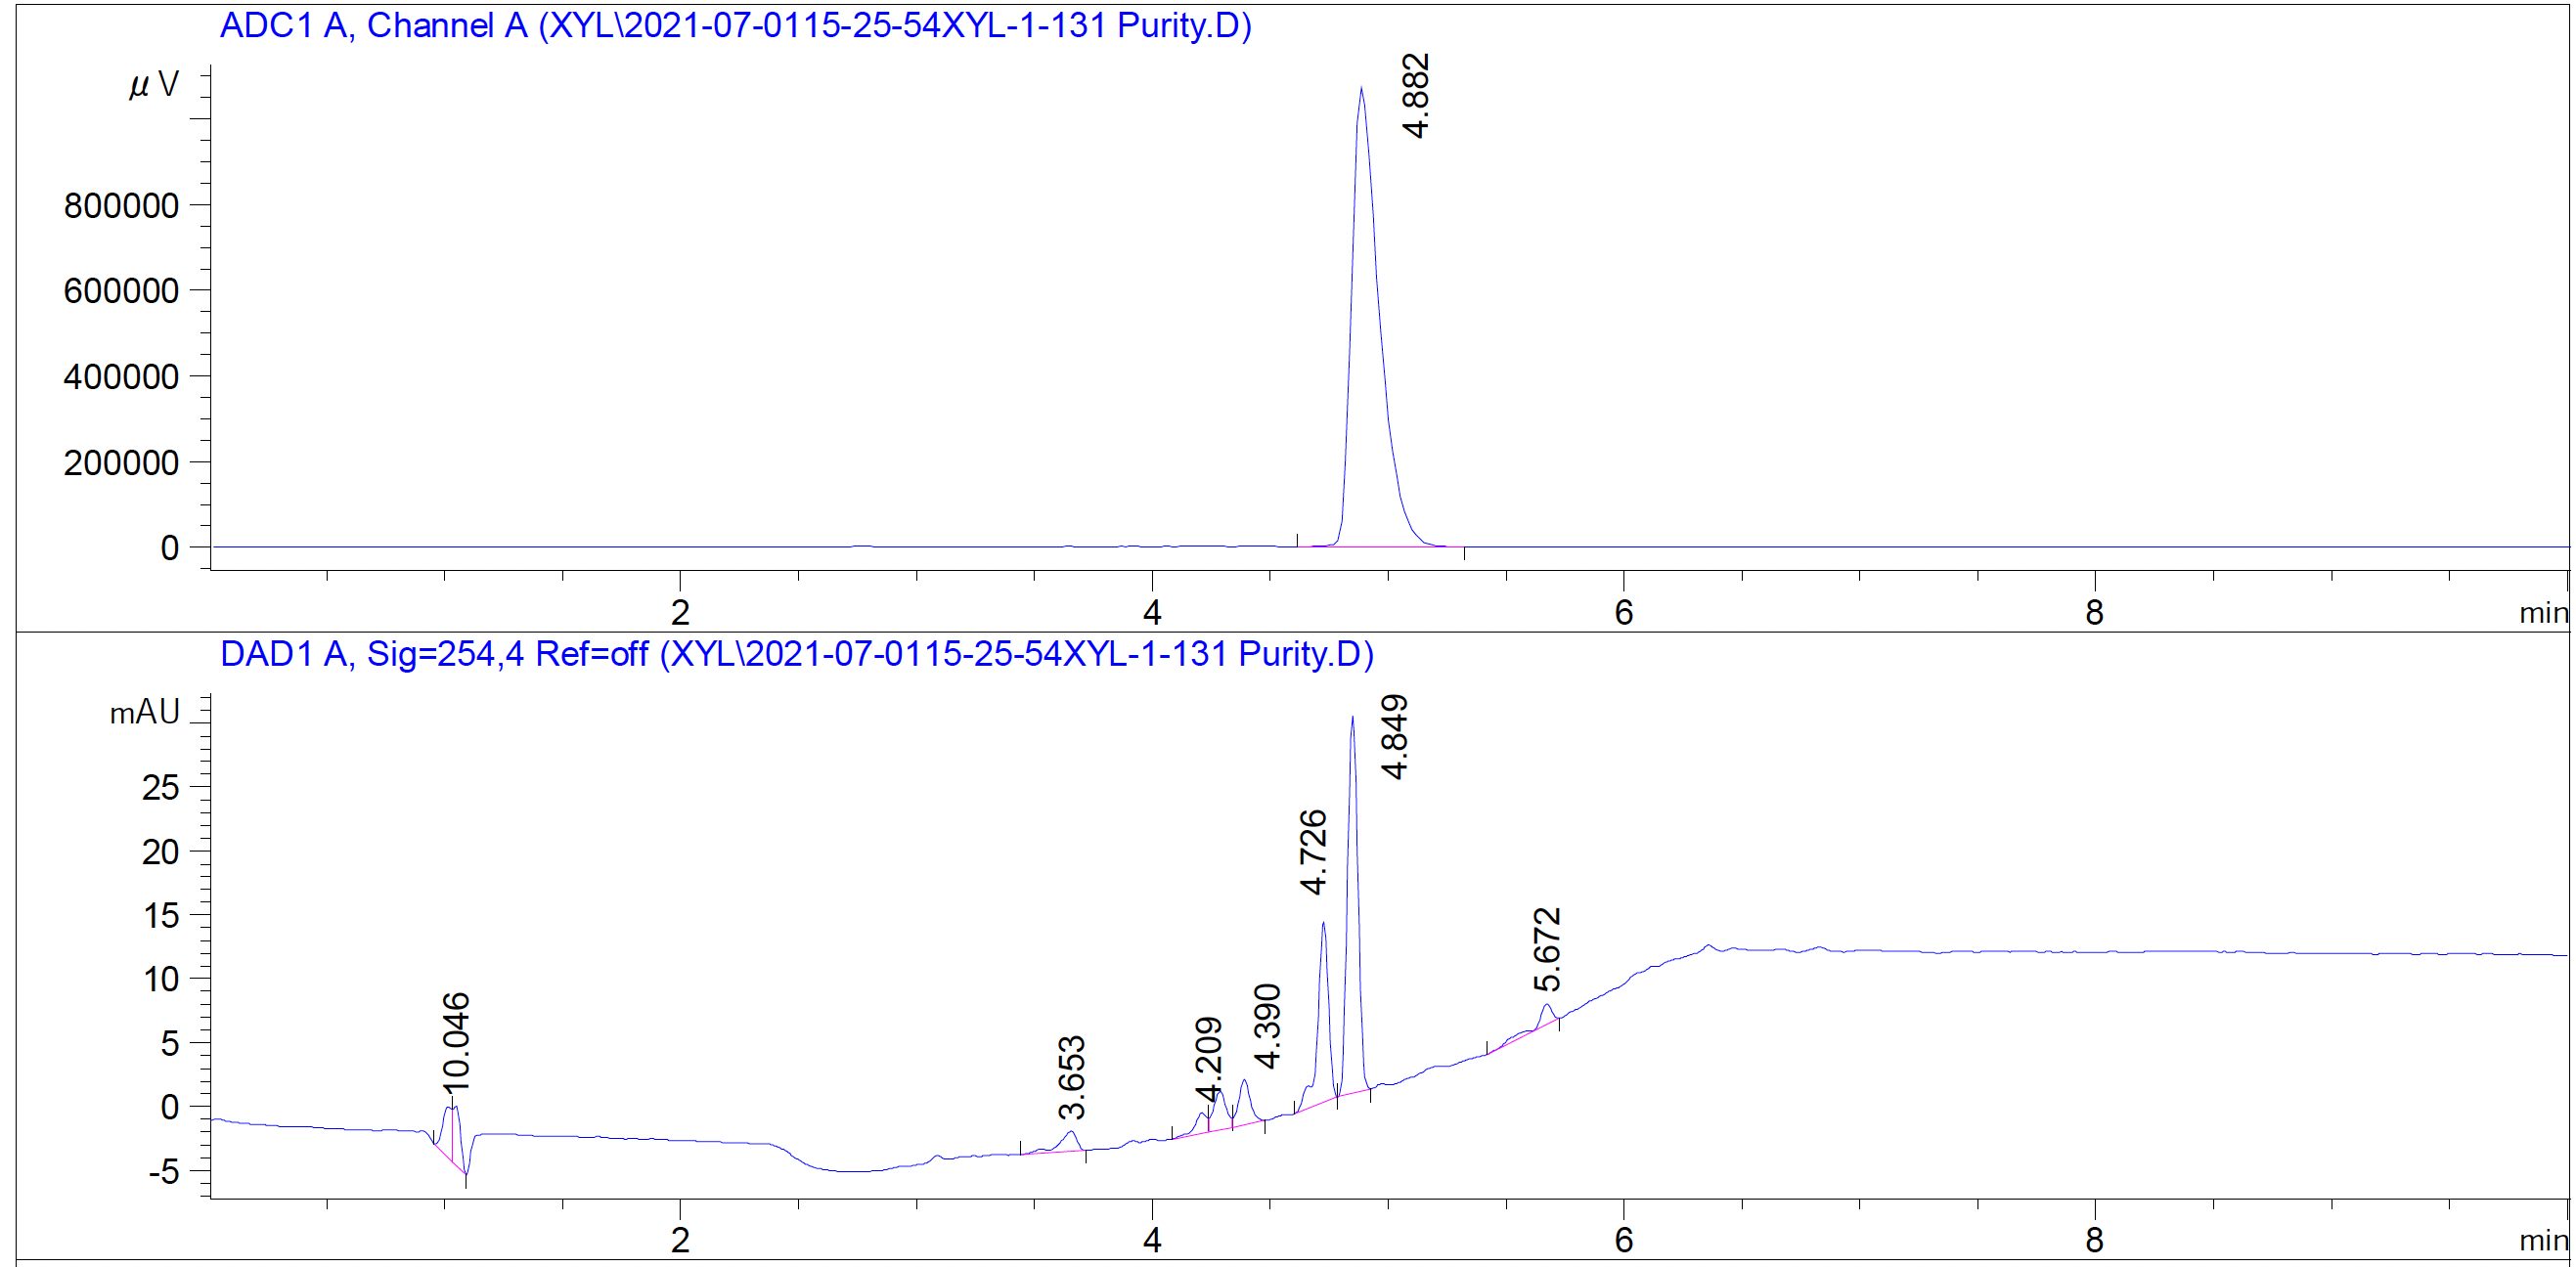


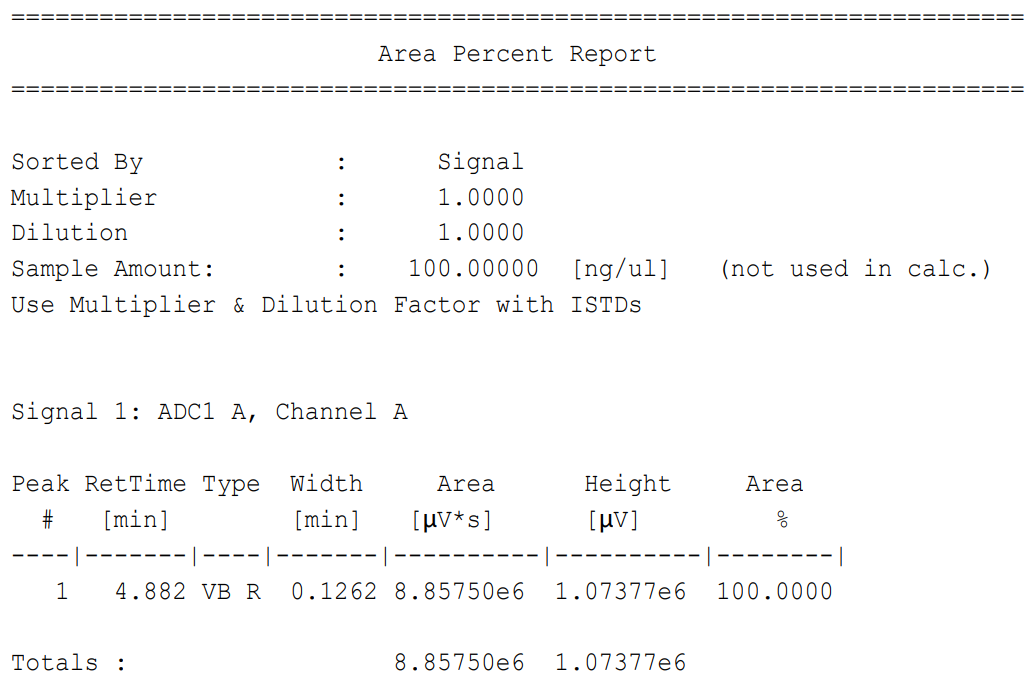


**Fig. S2.** Purity analysis HPLC chromatogram of [11C]**1**.


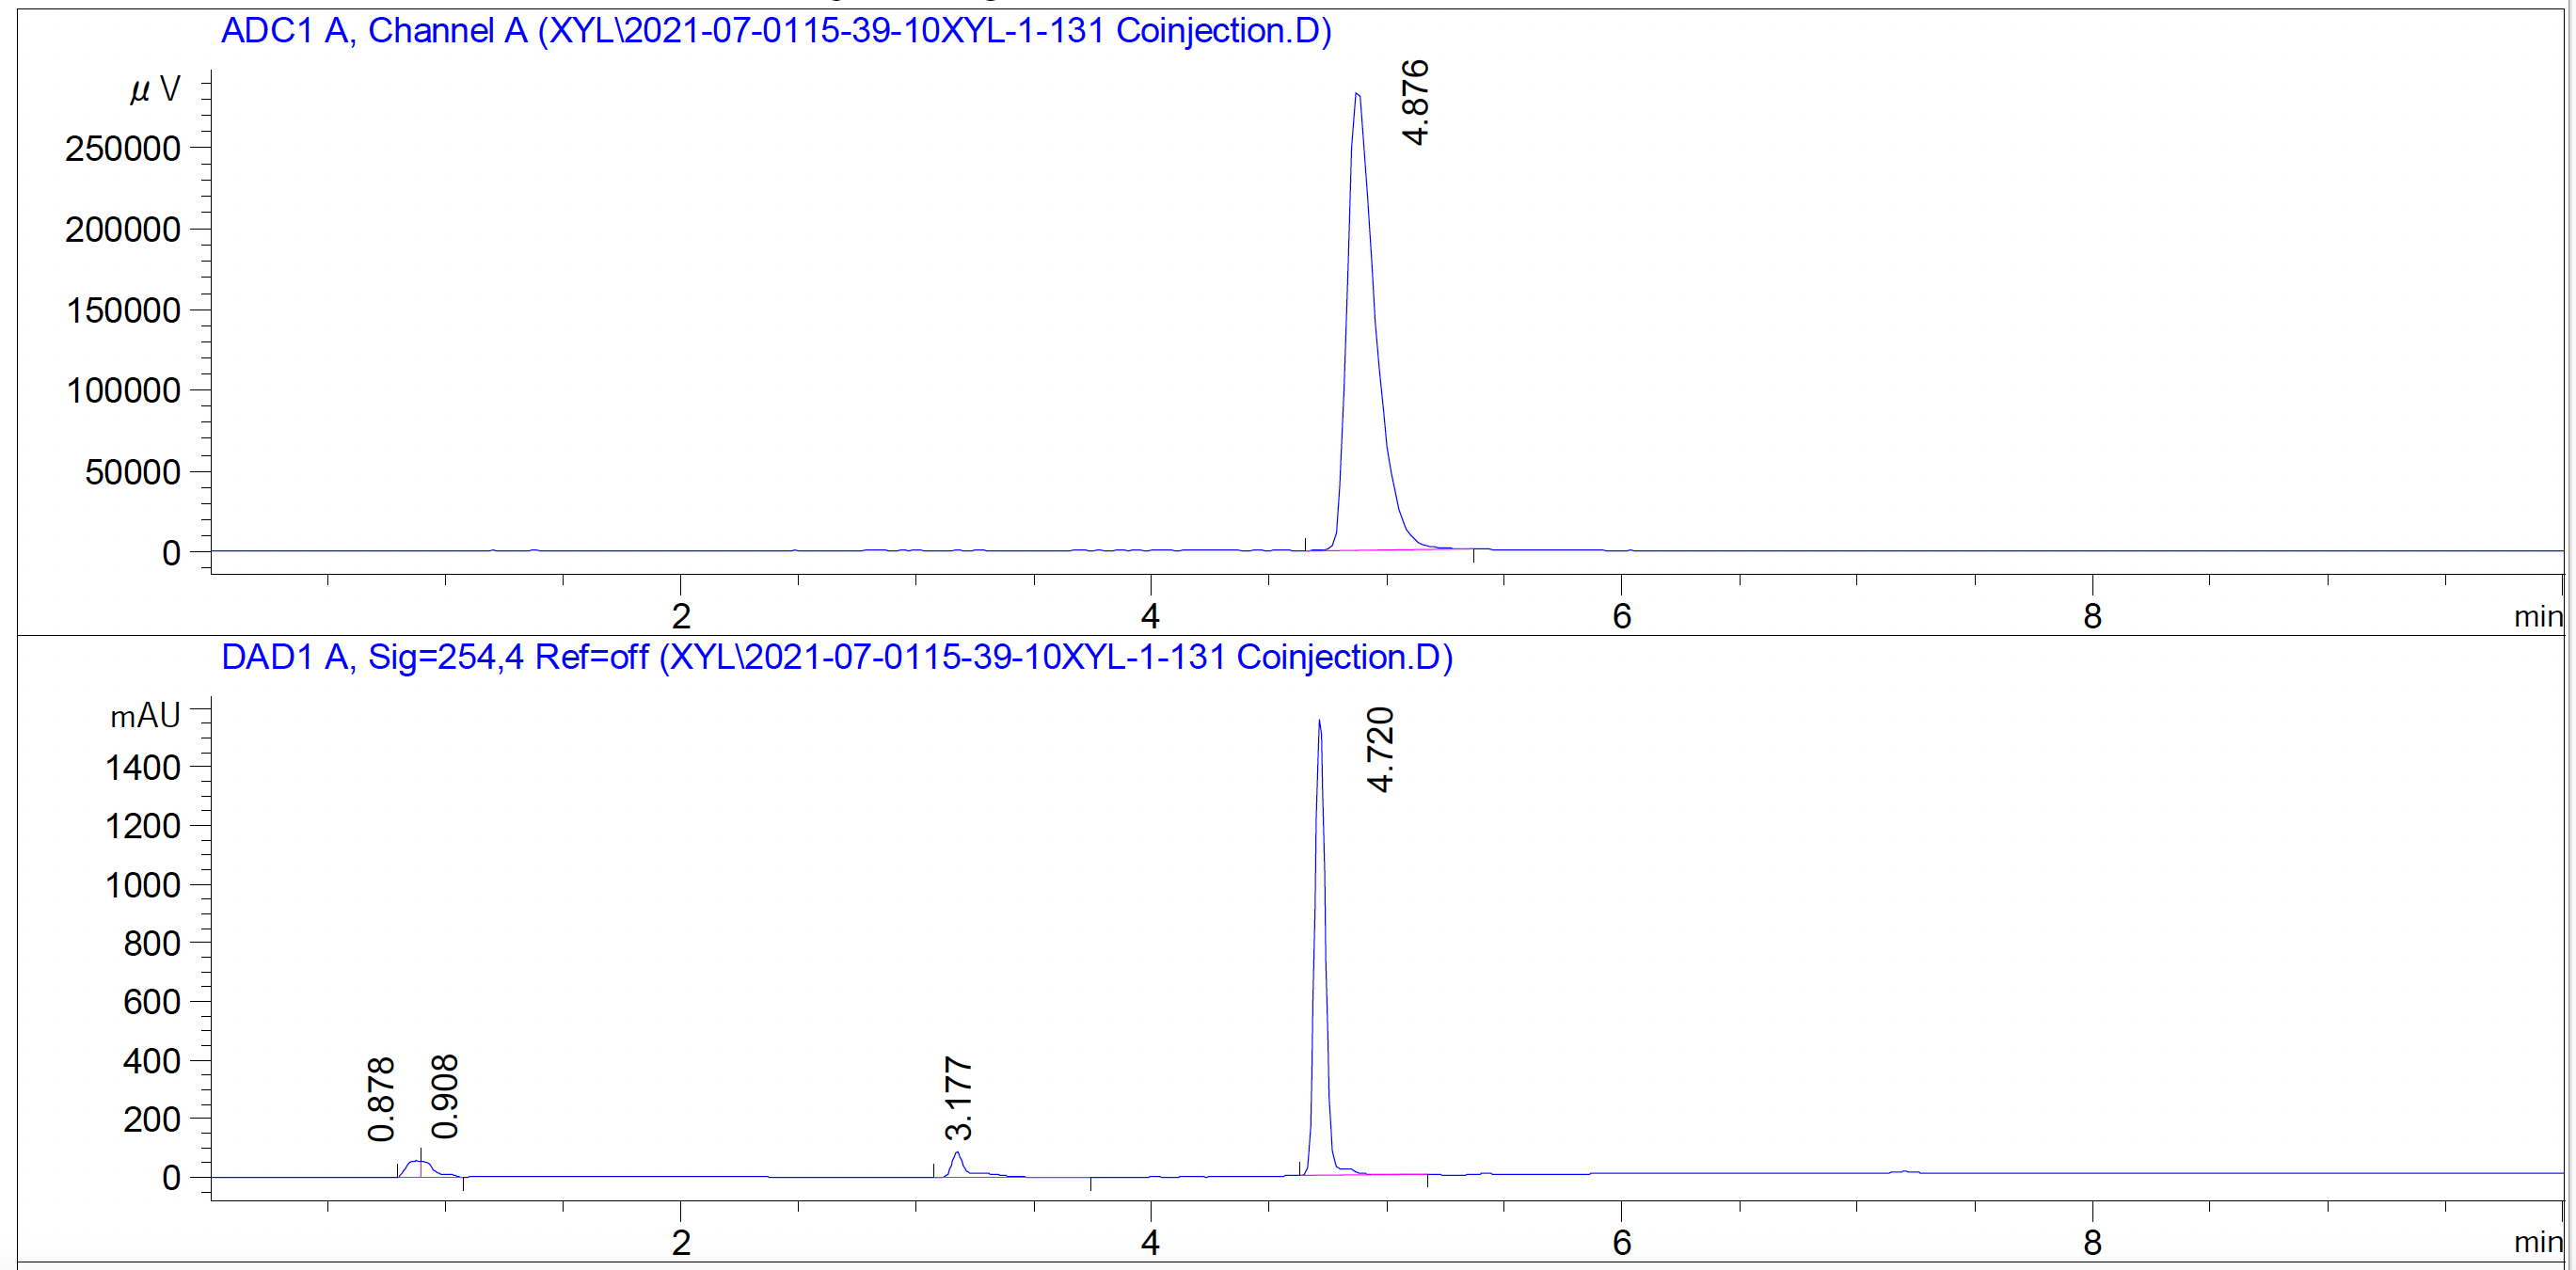


**Fig. S3.** HPLC chromatogram of co-injection of [11C]**1** and compound **1**.
